# Supplementary material
Source: PubMed Central journal article supplement (PMC3436589)

**Supplemental Figure 2A,B,C,D.** Cellular distribution of MT1/2 in the human cornea. FFPE sections (5  $\mu\text{m}$  thick) were stained with a monoclonal antibody to MT1/2 and analyzed with a fluorescent microscope (Axioskop; Carl Zeiss, Göttingen, Germany). The immunolabeling with MT1/2 antisera was visualized with a rhodamine-labeled secondary antibody (in red) and is confined in the cytoplasm of the cornea epithelium (Panel B) and endothelium (Panel D). Sections were counterstained with DAPI to stain the cell nuclei (in blue). Panels A and C are phase contrast micrographs of B and D respectively. Scale bar 20  $\mu\text{m}$

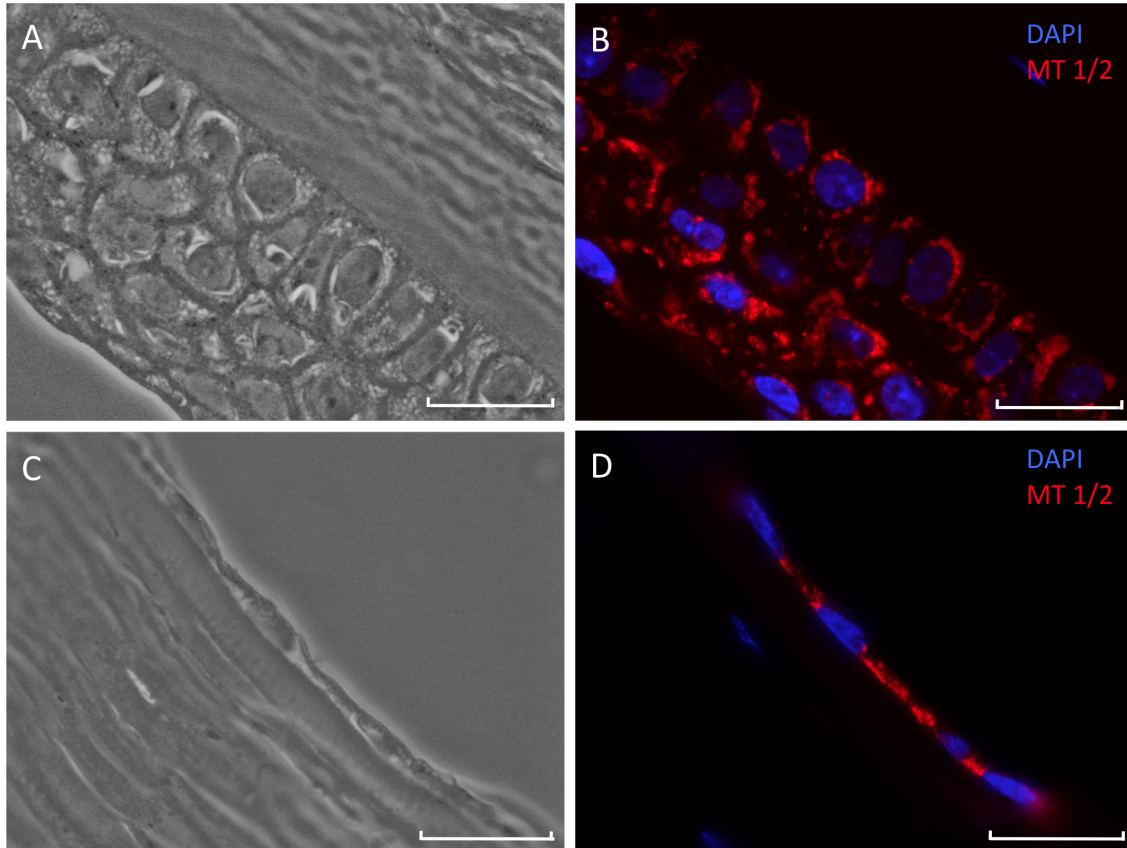

Supplement: supp_M112.365015_Supplemental_Figure_2.pdf [file supp_M112.365015_Supplemental_Figure_2.pdf]
