# Supplementary material
Source: PubMed Central journal article supplement (PMC3436589)

**Supplemental Figure 3A,B,C,D.** Cellular distribution of MT3 in the human retina. FFPE sections (5  $\mu\text{m}$  thick) were stained with a polyclonal antibody to MT3 and analyzed as described in Fig 2. MT3 antisera labeled (in red) preferentially the nerve fiber layer (NFL) and the cytoplasm of ganglion cells (GC). Sections were counterstained with DAPI to label (in blue) the cell nuclei. Panels A and C are phase contrast micrographs of B and D respectively. Scale bar 20  $\mu\text{m}$

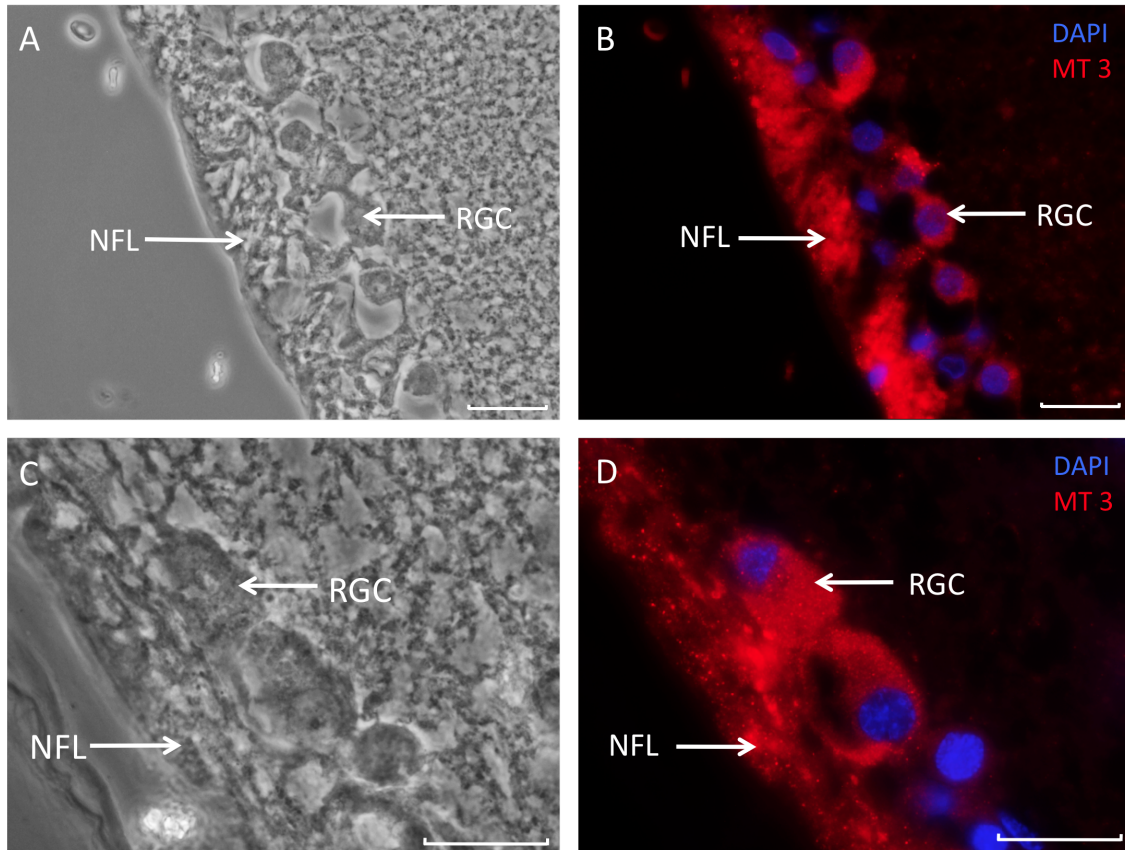

Supplement: supp_M112.365015_Supplemental_Figure_3.pdf [file supp_M112.365015_Supplemental_Figure_3.pdf]
