# Supplementary material
Source: PubMed Central journal article supplement (PMC3436589)
Supplement: supp_M112.365015_Supplemental_Figure_4.pdf [file supp_M112.365015_Supplemental_Figure_4.pdf]

**Supplemental Figure 4:**

Comparison of MALDI-TOF analysis, of undigested (Panel A) and digested (Panel B) MT-enriched fraction, separated by size exclusion chromatography, from HCEsv cells extract. Panel A: The spectra of undigested MTs revealed 3 peaks, of which the main peak exhibited an experimental molecular mass of 6042.92, very close to the theoretical molecular mass of 6042.16 assigned to the human MT2A. Panel B: Spectra of digested MTs. The MS spectra obtained was searched against the Swiss-Prot protein database using the online program Mascot. The mass tolerance was set at 100 ppm for peptide TOF-MS. Other parameters were typically set as follows: i) taxonomy, Homo sapiens; ii) trypsin digestion up to 6 miss cleavages; and iii) variable modification including acetyl (N-term) and oxidation (Met). This peptide mass mapping analysis identified the MT-2A with the highest sequence coverage (65%) and a Score of 52.

**A) MALDI-TOF (undigested MT-enriched fraction)**

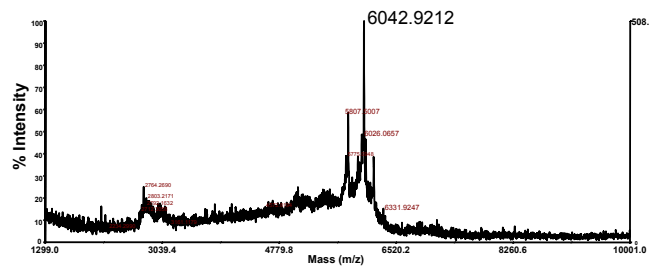

**MT-2A**

|                                 |                                                                                   |
|---------------------------------|-----------------------------------------------------------------------------------|
| Taxonomi identifier             | 9606 [NCBI]                                                                       |
| Molecular formula               | C <sub>225</sub> H <sub>384</sub> N <sub>71</sub> O <sub>83</sub> S <sub>21</sub> |
| Molecular weight (theoretical)  | 6042.16                                                                           |
| Molecular weight (experimental) | 60429.212                                                                         |

**B) MALDI-TOF (digested MT-enriched fraction)**

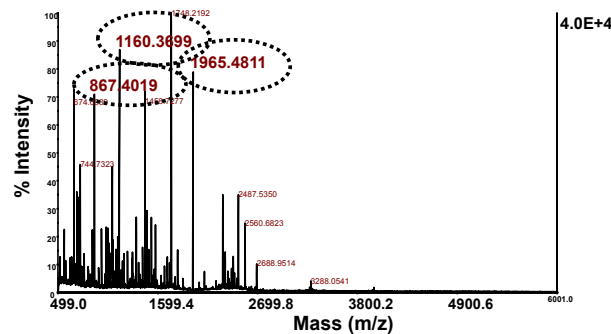

**Match to MT-2A Human (Score 52)**

| Observed | Mr(expt) | Mr(calc) | Delta | Peptide Sequence               |
|----------|----------|----------|-------|--------------------------------|
| 1965,48  | 1964,47  | 1964,65  | -0,18 | .(acetyl)MDPNCSAAGDSCTCAGSCK.C |
| 1160,37  | 1159,36  | 1159,40  | -0,03 | K.SCCSCCPVGCAK.C               |
| 867,40   | 866,39   | 866,34   | 0,05  | K.CAQGCICK.G Acetyl (N-term)   |
