# Supplementary material
Source: PubMed Central journal article supplement (PMC3436589)
Supplement: supp_M112.365015_Table1.pdf [file supp_M112.365015_Table1.pdf]

**Supplemental Table 1:** SF-ICP-MS and HPLC operating conditions and data acquisition parameters.

| <b>Plasma parameters</b>                                    |                                                                                                                                                                                                      |
|-------------------------------------------------------------|------------------------------------------------------------------------------------------------------------------------------------------------------------------------------------------------------|
| RF power/W                                                  | 1300                                                                                                                                                                                                 |
| Cool gas flow rate/l min <sup>-1</sup>                      | 16                                                                                                                                                                                                   |
| Sample gas flow rate/l min <sup>-1</sup>                    | 0.90                                                                                                                                                                                                 |
| Auxiliary gas flow rate/l min <sup>-1</sup>                 | 0.87                                                                                                                                                                                                 |
| <b>Data acquisition parameters (ID and IPD analysis)</b>    |                                                                                                                                                                                                      |
| Acquisition mode                                            | Total determination                                                                                                                                                                                  |
| Monitored isotopes                                          | <sup>64</sup> Zn, <sup>66</sup> Zn, <sup>67</sup> Zn, <sup>68</sup> Zn, <sup>70</sup> Zn, <sup>63</sup> Cu, <sup>65</sup> Cu, <sup>111</sup> Cd, <sup>114</sup> Cd                                   |
| Resolution                                                  | Medium (R=4000)                                                                                                                                                                                      |
| <b>Data acquisition parameters (ID and IPD-Post column)</b> |                                                                                                                                                                                                      |
| Acquisition mode                                            | Quantitative speciation                                                                                                                                                                              |
| Monitored isotopes                                          | <sup>32</sup> S, <sup>34</sup> S, <sup>64</sup> Zn, <sup>66</sup> Zn, <sup>67</sup> Zn, <sup>68</sup> Zn, <sup>70</sup> Zn, <sup>63</sup> Cu, <sup>65</sup> Cu, <sup>111</sup> Cd, <sup>114</sup> Cd |
| Resolution                                                  | Medium (R=4000)                                                                                                                                                                                      |
| <b>SEC-HPLC</b>                                             |                                                                                                                                                                                                      |
| Column                                                      | Superdex 200, 10/300 GL                                                                                                                                                                              |
| Eluent flow/ ml min <sup>-1</sup>                           | 0.6                                                                                                                                                                                                  |
| Eluent                                                      | 50 mM Tris/HCl, pH=7.4                                                                                                                                                                               |
| <b>AEC-HPLC</b>                                             |                                                                                                                                                                                                      |
| Column                                                      | Mono Q HR 5/50 GL (50 × 5 mm id)                                                                                                                                                                     |
| Flow rate/ ml min <sup>-1</sup>                             | 1                                                                                                                                                                                                    |
| Eluent                                                      | Buffer A: 10 mM Tris/HCl, pH=7.4;<br>Buffer B: 10 mM Tris/HCl, pH=7.4, 0,25M ammonium acetate                                                                                                        |
| Gradient of buffer B (time in min/%B)                       | 0/0, 1.5/2, 2/3, 5.5/4, 6/10, 10/17, 11/18, 12/99, 19/100, 23/0                                                                                                                                      |
