# Supplementary material
Source: PubMed Central journal article supplement (PMC3436589)
Supplement: supp_M112.365015_Table2.pdf [file supp_M112.365015_Table2.pdf]

**Supplemental Table 2:**

Concentration of sulfur, zinc, copper and cadmium ( $\mu\text{M}$ ) found in MTs proteins in the soluble extract from cultured HCEsv cells, under control state conditions, and after exposure to either: i)  $^{68}\text{ZnSO}_4$  ( $100\mu\text{M}$ ) alone; ii) IL1 $\alpha$  (100 U/ml), or iii) a combination of  $^{68}\text{ZnSO}_4$  ( $100\mu\text{M}$ ) and IL1 $\alpha$  (100 U/ml), during 24h. The stoichiometric composition of the MTs complexes was calculated by the determination of the sulfur to metal (Zn, Cu and Cd) ratio.

| <b>Treatment</b>                                                  | <b>Sulfur-MTs<br/>(<math>\mu\text{M}</math>)</b> | <b>Zinc-MTs<br/>(<math>\mu\text{M}</math>)</b> | <b>Copper-MTs<br/>(<math>\mu\text{M}</math>)</b> | <b>Cadmium-MTs<br/>(<math>\mu\text{M}</math>)</b> | <b>Ratio<br/>S:Zn:Cu:Cd</b> |
|-------------------------------------------------------------------|--------------------------------------------------|------------------------------------------------|--------------------------------------------------|---------------------------------------------------|-----------------------------|
| <b><i>Control</i></b>                                             | $5.08 \pm 0.08$                                  | $1.5 \pm 0.2$                                  | $0.315 \pm 0.005$                                | $0.0052 \pm 0.0005$                               | 21:6:1:0                    |
| <b>+ <math>^{68}\text{ZnSO}_4</math></b>                          | $19.9 \pm 0.5$                                   | $6.7 \pm 0.1$                                  | $0.25 \pm 0.01$                                  | $0.0201 \pm 0.0007$                               | 21:7:0:0                    |
| <b>+ <math>^{68}\text{ZnSO}_4</math> + IL1<math>\alpha</math></b> | $24.6 \pm 0.3$                                   | $8.2 \pm 0.1$                                  | $0.22 \pm 0.09$                                  | $0.0192 \pm 0.0001$                               | 21:7:0:0                    |
| <b>+ IL1<math>\alpha</math></b>                                   | $9.5 \pm 0.2$                                    | $3.15 \pm 0.02$                                | $0.15 \pm 0.04$                                  | $0.0107 \pm 0.0001$                               | 21:7:0:0                    |
