# Supplementary material
Source: PubMed Central journal article supplement (PMC3436589)
Supplement: supp_M112.365015_Table3.pdf [file supp_M112.365015_Table3.pdf]

**Supplemental Table 3:**

Concentration of natural ( $^{nat}\text{Zn}$ ) and “exogenous” zinc ( $^{68}\text{Zn}$ ) found in MTs, in cultured HCEsv cells, under control conditions (no treatment), and after exposure to either: i)  $^{68}\text{ZnSO}_4$  (100 $\mu\text{M}$ ) alone; ii) IL1 $\alpha$  (100 U/ml), or iii) a combination of  $^{68}\text{ZnSO}_4$  (100 $\mu\text{M}$ ) and IL1 $\alpha$  (100 U/ml), during 24h. The concentration of total zinc (Zn) reflects the sum of concentrations of zinc ( $^{nat}\text{Zn} + ^{68}\text{Zn}$ ) bound to MTs, distinct to MTs. The concentration of zinc in MTs, was determined by IPD-HLPC-ICP-MS in the soluble protein fraction of HCEsv cell extracts, after Anionic Exchange chromatography (AEC) separation.

| <b>Treatment</b>                                       | <b>Zinc –binding specie</b> | <b><math>^{nat}\text{Zn}</math> (<math>\mu\text{M}</math>)</b> | <b><math>^{68}\text{Zn}</math> (<math>\mu\text{M}</math>)</b> | <b>Total Zn (<math>^{nat}\text{Zn} + ^{68}\text{Zn}</math>) (<math>\mu\text{M}</math>)</b> |
|--------------------------------------------------------|-----------------------------|----------------------------------------------------------------|---------------------------------------------------------------|--------------------------------------------------------------------------------------------|
| <i>Control</i>                                         | <i>MTs</i>                  | 1.74 $\pm$ 0.03                                                | 0.0 $\pm$ 0.0                                                 | 1.74 $\pm$ 0.03                                                                            |
| + $^{68}\text{ZnSO}_4$                                 | <i>MTs</i>                  | 0.53 $\pm$ 0.01                                                | 6.43 $\pm$ 0.1                                                | 6.96 $\pm$ 0.1                                                                             |
| + $^{68}\text{ZnSO}_4$ + <i>IL1<math>\alpha</math></i> | <i>MTs</i>                  | 0.57 $\pm$ 0.05                                                | 7.4 $\pm$ 0.3                                                 | 8.0 $\pm$ 0.3                                                                              |
| + <i>IL1<math>\alpha</math></i>                        | <i>MTs</i>                  | 3.1 $\pm$ 0.1                                                  | 0.0 $\pm$ 0.0                                                 | 3.1 $\pm$ 0.1                                                                              |
