# Supplementary material
Source: PubMed Central journal article supplement (PMC3436589)
Supplement: supp_M112.365015_Table4.pdf [file supp_M112.365015_Table4.pdf]

**Supplemental Table 4:**

Total concentration of Zn (<sup>nat</sup>Zn and <sup>68</sup>Zn), Cu and Cd, found in HCEsv cell soluble extract, obtained by flow injection analysis (FIA). Cells were cultured for 24h in the absence (control) or presence of: i) <sup>68</sup>ZnSO<sub>4</sub> (100μM) alone; ii) IL1α (100 U/ml), and iii) a combination of <sup>68</sup>ZnSO<sub>4</sub> (100μM) and IL1α (100 U/ml).

| Treatment                                | <sup>nat</sup> Zn (μM) | <sup>68</sup> Zn (μM) | Total Zn<br>( <sup>nat</sup> Zn+ <sup>68</sup> Zn) (μM) | Cu (μM)       | Cd (μM)         |
|------------------------------------------|------------------------|-----------------------|---------------------------------------------------------|---------------|-----------------|
| <i>Control</i>                           | 4.2 ± 0.4              | 0.0 ± 0.0             | 4.2 ± 0.4                                               | 1.26 ± 0.01   | 0.0086 ± 0.0007 |
| + <sup>68</sup> ZnSO <sub>4</sub>        | 3.0 ± 0.2              | 7.6 ± 0.2             | 10.6 ± 0.4                                              | 1.02 ± 0.01   | 0.024 ± 0.001   |
| + <sup>68</sup> ZnSO <sub>4</sub> + IL1α | 2.7 ± 0.2              | 9.2 ± 0.1             | 11.9 ± 0.3                                              | 0.594 ± 0.008 | 0.021 ± 0.007   |
| + IL1α                                   | 6.44 ± 0.2             | 0.0 ± 0.0             | 6.44 ± 0.2                                              | 0.768 ± 0.004 | 0.0136 ± 0.0001 |
