# Supplementary material
Source: PubMed Central journal article supplement (PMC3436589)
Supplement: supp_M112.365015_Table5.pdf [file supp_M112.365015_Table5.pdf]

**Supplemental Table 5:**

Total Zn and Cu pellet levels ( $\mu\text{g}$ ) under control conditions (no treatment), and after exposure to either: i)  $^{68}\text{ZnSO}_4$  (100 $\mu\text{M}$ ) alone; ii)  $\text{IL1}\alpha$  (100 U/ml), or iii) a combination of  $^{68}\text{ZnSO}_4$  (100 $\mu\text{M}$ ) and  $\text{IL1}\alpha$  (100 U/ml), during 24h. Pellet from cultured HCEsv cells was obtained after cellular homogenate centrifugation, which is mainly composed by insoluble proteins.

| <b>Treatment</b>                             | <b><math>^{\text{nat}}\text{Zn}</math> (<math>\mu\text{g}</math>)</b> | <b><math>^{68}\text{Zn}</math> (<math>\mu\text{g}</math>)</b> | <b>Total Zn (<math>^{\text{nat}}\text{Zn}+^{68}\text{Zn}</math>) (<math>\mu\text{g}</math>)</b> | <b>Cu (<math>\mu\text{g}</math>)</b> |
|----------------------------------------------|-----------------------------------------------------------------------|---------------------------------------------------------------|-------------------------------------------------------------------------------------------------|--------------------------------------|
| <i>Control</i>                               | 0.051 $\pm$ 0.004                                                     | 0.0 $\pm$ 0.0                                                 | 0.051 $\pm$ 0.004                                                                               | 0.0291 $\pm$ 0.0003                  |
| + $^{68}\text{ZnSO}_4$                       | 0.048 $\pm$ 0.001                                                     | 0.026 $\pm$ 0.001                                             | 0.074 $\pm$ 0.001                                                                               | 0.024 $\pm$ 0.002                    |
| + $^{68}\text{ZnSO}_4$ + <i>IL1</i> $\alpha$ | 0.046 $\pm$ 0.007                                                     | 0.015 $\pm$ 0.004                                             | 0.061 $\pm$ 0.01                                                                                | 0.019 $\pm$ 0.002                    |
| + <i>IL1</i> $\alpha$                        | 0.065 $\pm$ 0.004                                                     | 0.0 $\pm$ 0.0                                                 | 0.065 $\pm$ 0.004                                                                               | 0.0319 $\pm$ 0.0005                  |
